# Supplementary material for: Introductory Biology in Social Context: The Effects of an Issues-Based Laboratory Course on Biology Student Motivation
Source: Atypon-hosted journal article supplement (doi:10.1187/cbe.18-07-0110), 2019-07-12
Supplement: combinedsupmats.pdf [file combinedsupmats.pdf]

# Supplemental Material

*CBE—Life Sciences Education*

Hewitt *et al.*

Supplemental Material.

The Socio-Scientific Issues based curriculum used in the article was a combination of previously published lab modules and newly developed modules situated in Socio-scientific issues (see Supplemental Material Table 1 for examples and references). For an example of a newly developed lab and how the socio-scientific issues are implemented see Hewitt, et al. 2014. Authors are happy to share all curricular materials with interested persons. For access, please contact corresponding author (L.Kayes).

Table 1. Outline of 10 Weeks of Socio-Scientific Issues-Based Labs Implemented

| Week No. | Lecture/Lab Topic                                         | Example Lab Activities                                                                                                                                                                        | Socio-Scientific Issue                                                                                                                               |
|----------|-----------------------------------------------------------|-----------------------------------------------------------------------------------------------------------------------------------------------------------------------------------------------|------------------------------------------------------------------------------------------------------------------------------------------------------|
| 1        | Mitosis & Meiosis                                         | Karyotype analyses of patients with case studies                                                                                                                                              | Genetic testing – What would you want to test for?                                                                                                   |
| 2        | Genetics                                                  | Investigate heritability of traits- compare artificial selection to genetic modification                                                                                                      | Should we allow GMO agriculture in our area?                                                                                                         |
| 3        | DNA Replication, Transcription & Translation              | Students extract their cheek DNA and perform PCR to find their genotype for bitter taste gene (see Merritt et al., 2012)                                                                      | Do you want your human genome sequenced? Who should have access to it?                                                                               |
| 4        | Molecular Biology                                         | Students analyze PCR results with gel electrophoresis to determine their genotype for bitter taste gene (see Merritt et al., 2012)                                                            | Cont'd previous                                                                                                                                      |
| 5        | Evolution & Natural Selection                             | Students analyze mtDNA sequences from humans of different origins and design a drug trial. (see Kalinowski et al., 2012) They use Hardy Weinberg to analyze course PTC allele frequency data. | Should doctors treat patients with certain medications based on “race”?<br>How should human evolutionary genomic research be reported to the public? |
| 6        | Climate & the Biosphere (conservation & animal migration) | Students predict amphibian migration events based on temp. and precipitation. (see Amphibians on the Move, Urban lab)                                                                         | What should be done about wildlife mortality on roadways?                                                                                            |
| 7        | Animal Behavior                                           | Students perform crayfish                                                                                                                                                                     | How would you deal                                                                                                                                   |

|    |                                |                                                                                                                                                 |                                                               |
|----|--------------------------------|-------------------------------------------------------------------------------------------------------------------------------------------------|---------------------------------------------------------------|
|    | (Invasive Crayfish Behavior)   | agonistic behavior contests with invasive crayfish. (see Hewitt et al., 2014)                                                                   | with existing populations of invasive crayfish in our state?  |
| 8  | Terrestrial Ecology I          | Students identify plants from local creek watershed and prep for being part of course-wide experiment in false brome removal.                   | What should be done about noxious weeds in our area?          |
| 9  | Terrestrial Ecology II         | Students pull and measure false brome in plots in the field while learning ecological sampling methods.                                         | Cont'd previous                                               |
| 10 | Human Impacts on the Ecosystem | Students were assigned an outdoor environment and developed and presented an ecotour based on what they learned over the term. (see Boes, 2013) | How should we deal with tourism's impacts on the environment? |

---

Boes, K.E. (2013). Campus Eco Tours: An Integrative & Interactive Field Project for Undergraduate Biology Students. *The American Biology Teacher*, 75, 330-334.

Hewitt K., Kayes, L.J., Hubert, D., & Chouinard, A. (2014). An Issues-based laboratory module for integrating animal behavior and invasive species concepts: Investigating the effects of the invasive red swamp crayfish. *American Biology Teacher*, 76, 609-614. DOI: 10.1525/abt.2014.76.9.7

Kalinowski, S.T., Andrews, T.M., Leonard, M.J., & Snodgrass, M. (2012). Are Africans, Europeans, and Asians different "races"? A guided-inquiry lab for introducing undergraduate students to genetic diversity and preparing them to study natural selection. *CBE-Life Sci Educ*, 11, 142-151.

Merritt, R.B., Bierwert, L., Slatko, B., Weiner, M.P., Ingram, J., Sciarra, K., & Weiner, E. (2008). Tasting phenylthiocarbamide (PTC): A new integrative genetics lab with an old flavor. *The American Biology Teacher*, 70, 23-28.

Taylor, C., Freidenfelds, N., & Urban M. (2012). Amphibians on the move: Predicting why and when. Retrieved from: <http://hydrodictyon.eeb.uconn.edu/people/urban/teachers.html>

**Table 2.**

*Student responses to questionnaires by code categories, descriptions and frequencies from open response questions given in the end of term (week 10 survey).*

| Survey Question    | Coded Category                                 | Number of References |                                                                                         | Code Description                                                                                                             |
|--------------------|------------------------------------------------|----------------------|-----------------------------------------------------------------------------------------|------------------------------------------------------------------------------------------------------------------------------|
|                    |                                                | SSI<br>(n=435)       | Control<br>(n=415)                                                                      |                                                                                                                              |
| GTA Relationships  | Excited to teach                               | 178                  | 137                                                                                     | GTA was perceived to be excited about teaching and/or passionate about the subject                                           |
|                    | Somewhat excited to teach                      | 8                    | 6                                                                                       | GTA was perceived to be somewhat excited about teaching or excited to teach a particular topic but not others                |
|                    | Didn't seem excited to teach                   | 9                    | 17                                                                                      | GTA was not perceived to be excited about teaching and/or passionate about the subject                                       |
|                    | Positive about GTA quality and/or relationship | 249                  | 155                                                                                     | GTA was perceived to be "awesome", "wonderful", "excellent", etc.                                                            |
|                    | Average quality/relationship                   | 13                   | 19                                                                                      | GTA was perceived to be "average", "ok", "fine", etc.                                                                        |
|                    | Negative/no relationship                       | 14                   | 31                                                                                      | GTA was perceived to be "rude", "mean", "cold", etc. Some stated a general dislike for the GTA                               |
|                    | Cares about student learning                   | 264                  | 240                                                                                     | GTA spent time with students giving them extra help and/or were reported to display a caring attitude about student learning |
|                    | Knowledgeable                                  | 57                   | 39                                                                                      | GTA was perceived to be knowledgeable about biology                                                                          |
|                    | Made things fun                                | 27                   | 24                                                                                      | GTA made things "fun", "enjoyable", "exciting", etc.                                                                         |
|                    | Confused or ill-prepared                       | 28                   | 19                                                                                      | GTA was perceived to be "confused", "misinformed", "unorganized", etc.                                                       |
| Good communication | 11                                             | 9                    | GTA was perceived to be very accessible through emails, office hours, after class, etc. |                                                                                                                              |

|                      |                                                       |     |     |                                                                                                                                |
|----------------------|-------------------------------------------------------|-----|-----|--------------------------------------------------------------------------------------------------------------------------------|
|                      | Unfair grader                                         | 6   | 10  | The GTA was a “harsh” grader or unclear about expectations                                                                     |
|                      | Low interaction                                       | 9   | 10  | There was an insufficient amount of interaction with GTA in class                                                              |
| Peer Relationships   | Positive/friendly interactions                        | 394 | 355 | Students “got along” with their peers or enjoyed working together, made friends, etc.                                          |
|                      | Negative/problematic interactions                     | 32  | 46  | Students did not get along with one or more group members and/or cited examples of problematic group interactions              |
|                      | Neutral interactions                                  | 35  | 25  | Students got along “fine” or “ok” with peers                                                                                   |
|                      | Equal contribution                                    | 244 | 218 | Peers contributed equally in the lab activities                                                                                |
|                      | Unequal contribution                                  | 37  | 50  | Peers did not contribute equally in the lab activities                                                                         |
|                      | Somewhat equal contribution                           | 9   | 13  | Peers contributed equally “sometimes”, or during some labs                                                                     |
| Curriculum Relevance | Skills development for career or coursework           | 194 | 203 | Some activities were relevant to what they would do in their future careers or in other coursework                             |
|                      | No relation                                           | 131 | 165 | Students saw no relevance of the lab activities to their daily lives or future career goals                                    |
|                      | Real world relevance/informed decision-making         | 79  | 13  | Lab activities helped inform students about issues important for their lives and/or gave them a sense of social responsibility |
|                      | Interesting or enjoyable                              | 54  | 28  | Lab activities were “interesting”, “fun”, “enjoyable”, etc.                                                                    |
|                      | Major requirement                                     | 29  | 27  | Relevant to completion of a major requirement                                                                                  |
|                      | Teamwork/social skills                                | 14  | 15  | Developed social skills working in a collaborative setting                                                                     |
|                      | Changed or verified goals, interests, or career paths | 12  | 2   | Affirmed interests in certain careers in science or helped them explore new options                                            |
|                      | Biology relates to everything                         | 7   | 9   | It’s relevant because life is all around us                                                                                    |
